# Supplementary material for: Pathogenic Variant Spectrum in Breast Cancer Risk Genes in Finnish Patients
Source: MDPI journal article supplement (doi:10.3390/cancers14246158), 2022-12-14
Supplement: s1 [file s1]

# Pathogenic Variant Spectrum in Breast Cancer Risk Genes in Finnish Patients

Anna K. Nurmi, Maija Suvanto, Joe Dennis, Kristiina Aittomäki, Carl Blomqvist and Heli Nevanlinna

## Supplementary Information

**Table S1.** Detected and validated copy number variants

**Table S2.** Carriers of more than one pathogenic variant

**Table S3.** Missenses of uncertain significance

**Table S4.** Pathogenic variants in the *BRCA1* and *BRCA2* genes

**Table S5.** Frequencies of pathogenic variants identified in patients diagnosed with breast cancer at different ages

**Supplementary References (Table S4)**

**Table S1.** Detected and validated copy number variants

| Gene          | CamCNV pipeline called regions (human genome build 19) |           |           |        |          |           |                  |          |          | Multiplex ligation-dependent probe amplification |                   |            |          |          |
|---------------|--------------------------------------------------------|-----------|-----------|--------|----------|-----------|------------------|----------|----------|--------------------------------------------------|-------------------|------------|----------|----------|
|               | Chr                                                    | Start     | End       | Length | CNV call | Array     | Number of probes | Patients | Controls | Validated                                        | Exons affected    | Assay      | Patients | Controls |
| <i>BRCA1</i>  | 17                                                     | 41209139  | 41585657  | 376519 | Dup      | iCOGS     | 106              | 0        | 1        | Yes                                              | 1-20 <sup>1</sup> | P002       | 0        | 1        |
| <i>BRCA1</i>  | 17                                                     | 41218805  | 41223094  | 4290   | Dup      | iCOGS     | 10               | 3        | 0        | No                                               | NA                | P002       | 0        | 0        |
| <i>BRCA1</i>  | 17                                                     | 41219619  | 41223094  | 3476   | Dup      | iCOGS     | 8                | 1        | 0        | No                                               | NA                | P002       | 0        | 0        |
| <i>BRCA1</i>  | 17                                                     | 41232293  | 41234592  | 2300   | Dup      | OncoArray | 6                | 1        | 0        | Yes                                              | 13 <sup>1</sup>   | P002       | 1        | 0        |
| <i>BRCA2</i>  | 13                                                     | 32911796  | 32912402  | 607    | Dup      | iCOGS     | 7                | 1        | 0        | No                                               | NA                | P090       | 0        | 0        |
| <i>BRCA2</i>  | 13                                                     | 32912073  | 32912402  | 330    | Del      | iCOGS     | 5                | 0        | 1        | No                                               | NA                | P090       | 0        | 0        |
| <i>ATM</i>    | 11                                                     | 108234836 | 108240069 | 5234   | Dup      | iCOGS     | 5                | 0        | 1        | Yes                                              | 62-63             | P042       | 0        | 1        |
| <i>ATM</i>    | 11                                                     | 108234836 | 108244114 | 9279   | Dup      | iCOGS     | 6                | 11       | 5        | Yes                                              | 62-63             | P041, P042 | 11       | 5        |
| <i>ATM</i>    | 11                                                     | 108234836 | 108261261 | 26426  | Dup      | iCOGS     | 8                | 0        | 1        | Yes                                              | 62-63             | P042       | 0        | 1        |
| <i>ATM</i>    | 11                                                     | 108235879 | 108243476 | 7598   | Dup      | OncoArray | 7                | 0        | 2        | Yes                                              | 62-63             | P042       | 0        | 2        |
| <i>ATM</i>    | 11                                                     | 108237662 | 108244114 | 6453   | Dup      | iCOGS     | 4                | 1        | 0        | Yes                                              | 62-63             | P041, P042 | 1        | 0        |
| <i>CHEK2</i>  | 22                                                     | 29121019  | 29121326  | 308    | Del      | iCOGS     | 4                | 1        | 0        | Yes                                              | 3-4               | P190       | 1        | 0        |
| <i>RAD51C</i> | 17                                                     | 56757584  | 56802141  | 44558  | Dup      | iCOGS     | 25               | 2        | 0        | Yes                                              | 1-7               | P260       | 2        | 0        |
| <i>RAD51C</i> | 17                                                     | 56757584  | 56808956  | 51373  | Dup      | iCOGS     | 27               | 1        | 0        | Yes                                              | 1-7               | P260       | 1        | 0        |

<sup>1</sup> *BRCA1* legacy name exon.

**Table S2.** Carriers of more than one pathogenic variant

| Patient | Variants                                                               | Patient series             |
|---------|------------------------------------------------------------------------|----------------------------|
| 1       | <i>PALB2</i> c.1592del, <i>FANCM</i> c.5101C>T                         | Familial BC                |
| 2       | <i>CHEK2</i> c.1100del, <i>FANCM</i> c.5101C>T                         | Familial BC                |
| 3       | <i>CHEK2</i> c.1100del homozygous                                      | Familial BC                |
| 4       | <i>CHEK2</i> c.1100del homozygous                                      | Familial BC, unselected BC |
| 5       | <i>CHEK2</i> c.1100del, <i>CHEK2</i> c.319+2T>A                        | Familial BC, unselected BC |
| 6       | <i>CHEK2</i> c.1100del, <i>FANCM</i> c.5101C>T                         | Familial BC, unselected BC |
| 7       | <i>BRCA2</i> c.7480C>T, <i>CHEK2</i> c.1100del, <i>FANCM</i> c.5101C>T | Unselected BC              |
| 8       | <i>BRCA1</i> c.3626del, <i>CHEK2</i> c.319+2T>A                        | Unselected BC              |
| 9       | <i>PALB2</i> c.1592del, <i>FANCM</i> c.5101C>T                         | Unselected BC              |

**Table S3.** Missenses of uncertain significance

| Gene         | Variant <sup>1</sup>      | Domain or region     | All BC patients <sup>2</sup> | Familial BC patients | Unselected BC patients | Controls           | Pathogenicity interpretation                 | Predictions                  | CADD |
|--------------|---------------------------|----------------------|------------------------------|----------------------|------------------------|--------------------|----------------------------------------------|------------------------------|------|
|              |                           |                      | Carriers/total (%)           | Carriers/total (%)   | Carriers/total (%)     | Carriers/total (%) | ClinVar                                      | Helix                        |      |
| <i>ATM</i>   | c.1727T>C, p.(Ile576Thr)  | NA                   | 1/1769 (0.06)                | 1/699 (0.14)         | 1/1356 (0.07)          | 2/1112 (0.18)      | Uncertain significance                       | Benign, medium confidence    | 25   |
| <i>ATM</i>   | c.1832T>A, p.(Ile611Asn)  | NA                   | 1/1769 (0.06)                | 1/699 (0.14)         | 0/1356 (0)             | 1/1112 (0.09)      | NA                                           | Benign, medium confidence    | 25.4 |
| <i>ATM</i>   | c.3247C>T, p.(His1083Tyr) | NA                   | 0/1732 (0)                   | 0/693 (0)            | 0/1324 (0)             | 1/1062 (0.09)      | Uncertain significance                       | Benign, medium confidence    | 25.9 |
| <i>ATM</i>   | c.5296C>T, p.(Pro1766Ser) | NA                   | 3/1769 (0.17)                | 1/699 (0.14)         | 2/1356 (0.15)          | 0/1112 (0)         | NA                                           | Benign, medium confidence    | 25   |
| <i>ATM</i>   | c.5551C>T, p.(Leu1851Phe) | NA                   | 1/1769 (0.06)                | 0/699 (0)            | 1/1356 (0.07)          | 0/1112 (0)         | Uncertain significance                       | Benign, high confidence      | 25.9 |
| <i>ATM</i>   | c.6313A>G, p.(Arg2105Gly) | FAT                  | 4/1706 (0.23)                | 1/679 (0.15)         | 4/1307 (0.31)          | 6/1042 (0.58)      | Uncertain significance                       | Benign, medium confidence    | 31   |
| <i>ATM</i>   | c.7375C>G, p.(Arg2459Gly) | FAT                  | 1/1769 (0.06)                | 0/699 (0)            | 1/1356 (0.07)          | 0/1111 (0)         | Uncertain significance                       | Benign, low confidence       | 26.6 |
| <i>ATM</i>   | c.7547T>G, p.(Phe2516Cys) | FAT                  | 1/1768 (0.06)                | 0/699 (0)            | 1/1355 (0.07)          | 2/1112 (0.18)      | Uncertain significance                       | Deleterious, low confidence  | 26.3 |
| <i>ATM</i>   | c.8734A>G, p.(Arg2912Gly) | PI3K/PI4K            | 1/1769 (0.06)                | 0/699 (0)            | 1/1356 (0.07)          | 0/1112 (0)         | Uncertain significance                       | Deleterious, low confidence  | 28   |
| <i>ATM</i>   | c.9094G>C, p.(Val3032Leu) | FATC                 | 2/1769 (0.11)                | 1/699 (0.14)         | 2/1356 (0.15)          | 1/1112 (0.09)      | Uncertain significance                       | Deleterious, low confidence  | 24.7 |
| <i>BARD1</i> | c.1307C>G, p.(Ser436Cys)  | ANK 1 repeat         | 1/1769 (0.06)                | 0/699 (0)            | 1/1356 (0.07)          | 0/1112 (0)         | Uncertain significance                       | Benign, low confidence       | 26.6 |
| <i>BARD1</i> | c.1829C>A, p.(Pro610His)  | BRCT 1               | 1/1749 (0.06)                | 0/692 (0)            | 1/1342 (0.07)          | 0/1075 (0)         | NA                                           | Benign, low confidence       | 26.1 |
| <i>BRIP1</i> | c.257G>A, p.(Cys86Tyr)    | Helicase ATP-binding | 0/1768 (0)                   | 0/699 (0)            | 0/1355 (0)             | 1/1107 (0.09)      | Uncertain significance                       | Deleterious, low confidence  | 24.9 |
| <i>BRIP1</i> | c.806C>T, p.(Ser269Leu)   | Helicase ATP-binding | 1/1769 (0.06)                | 0/699 (0)            | 1/1356 (0.07)          | 0/1112 (0)         | Uncertain significance                       | Benign, low confidence       | 28.6 |
| <i>BRIP1</i> | c.1061C>T, p.(Thr354Ile)  | Helicase ATP-binding | 1/1769 (0.06)                | 1/699 (0.14)         | 0/1356 (0)             | 0/1112 (0)         | Uncertain significance                       | Benign, medium confidence    | 26.5 |
| <i>BRIP1</i> | c.1774T>C, p.(Trp592Arg)  | NA                   | 1/1769 (0.06)                | 0/699 (0)            | 1/1356 (0.07)          | 0/1112 (0)         | NA                                           | Deleterious, high confidence | 28.1 |
| <i>BRIP1</i> | c.2275G>A, p.(Ala759Thr)  | NA                   | 0/1769 (0)                   | 0/699 (0)            | 0/1356 (0)             | 1/1112 (0.09)      | NA                                           | Deleterious, low confidence  | 29.1 |
| <i>CHEK2</i> | c.607G>T, p.(Asp203Tyr)   | NA                   | 0/1737 (0)                   | 0/693 (0)            | 0/1326 (0)             | 2/1061 (0.19)      | NA                                           | Benign, low confidence       | 32   |
| <i>CHEK2</i> | c.715G>A, p.(Glu239Lys)   | Protein kinase       | 1/1743 (0.06)                | 0/694 (0)            | 1/1334 (0.07)          | 0/1062 (0)         | Uncertain significance                       | Deleterious, low confidence  | 23.3 |
| <i>CHEK2</i> | c.1022A>C, p.(Asn341Thr)  | Protein kinase       | 1/1769 (0.06)                | 0/699 (0)            | 1/1356 (0.07)          | 0/1112 (0)         | Uncertain significance                       | Deleterious, low confidence  | 26   |
| <i>CHEK2</i> | c.1427C>T, p.(Thr476Met)  | Protein kinase       | 2/1761 (0.11)                | 1/698 (0.14)         | 1/1349 (0.07)          | 0/1108 (0)         | Likely pathogenic,<br>Uncertain significance | Deleterious, low confidence  | 26.3 |
| <i>CHEK2</i> | c.1447C>T, p.(His483Tyr)  | Protein kinase       | 1/1761 (0.06)                | 1/698 (0.14)         | 1/1349 (0.07)          | 0/1107 (0)         | Uncertain significance                       | Deleterious, low confidence  | 28.2 |

**Table S3.** continues

| Gene          | Variant <sup>1</sup>      | Domain or region            | All BC patients <sup>2</sup> | Familial BC patients | Unselected BC patients | Controls           | Pathogenicity interpretation | Predictions                 |      |
|---------------|---------------------------|-----------------------------|------------------------------|----------------------|------------------------|--------------------|------------------------------|-----------------------------|------|
|               |                           |                             | Carriers/total (%)           | Carriers/total (%)   | Carriers/total (%)     | Carriers/total (%) | ClinVar                      | Helix                       | CADD |
| <i>FANCM</i>  | c.163G>A, p.(Asp55Asn)    | NA                          | 4/1769 (0.23)                | 2/699 (0.29)         | 3/1356 (0.22)          | 0/1112 (0)         | Uncertain significance       | Benign, high confidence     | 27.6 |
| <i>FANCM</i>  | c.269C>T, p.(Pro90Leu)    | NA                          | 1/1769 (0.06)                | 0/699 (0)            | 1/1356 (0.07)          | 0/1112 (0)         | Uncertain significance       | Benign, high confidence     | 26.8 |
| <i>FANCM</i>  | c.1508T>A, p.(Ile503Asn)  | Helicase C-terminal         | 1/1769 (0.06)                | 0/699 (0)            | 1/1356 (0.07)          | 0/1112 (0)         | NA                           | Benign, low confidence      | 27   |
| <i>FANCM</i>  | c.1597C>T, p.(Arg533Cys)  | Helicase C-terminal         | 0/1769 (0)                   | 0/699 (0)            | 0/1356 (0)             | 1/1112 (0.09)      | Uncertain significance       | Benign, low confidence      | 32   |
| <i>PALB2</i>  | c.101G>A, p.(Arg34His)    | DNA-binding                 | 1/1769 (0.06)                | 0/699 (0)            | 1/1356 (0.07)          | 0/1112 (0)         | Uncertain significance       | Benign, high confidence     | 28.2 |
| <i>PALB2</i>  | c.2689C>T, p.(Leu897Phe)  | WD 1 repeat                 | 1/1769 (0.06)                | 1/699 (0.14)         | 0/1356 (0)             | 0/1112 (0)         | Uncertain significance       | Benign, low confidence      | 26.3 |
| <i>PALB2</i>  | c.3520G>A, p.(Gly1174Arg) | WD 7 repeat                 | 0/1769 (0)                   | 0/699 (0)            | 0/1356 (0)             | 1/1112 (0.09)      | Uncertain significance       | Deleterious, low confidence | 29.6 |
| <i>RAD51C</i> | c.772C>T, p.(Arg258Cys)   | NA                          | 0/1769 (0)                   | 0/699 (0)            | 0/1356 (0)             | 1/1112 (0.09)      | Uncertain significance       | Deleterious, low confidence | 29.7 |
| <i>RAD51C</i> | c.1103G>A, p.(Arg368Gln)  | Nuclear localization signal | 1/1758 (0.06)                | 0/695 (0)            | 1/1349 (0.07)          | 0/1091 (0)         | Uncertain significance       | Benign, low confidence      | 25.6 |
| <i>RAD51D</i> | c.287G>T, p.(Gly96Val)    | NA                          | 1/1769 (0.06)                | 0/699 (0)            | 1/1356 (0.07)          | 2/1112 (0.18)      | NA                           | Deleterious, low confidence | 25.4 |
| <i>RAD51D</i> | c.899G>A, p.(Arg300Gln)   | NA                          | 1/1769 (0.06)                | 1/699 (0.14)         | 0/1356 (0)             | 0/1111 (0)         | Uncertain significance       | Deleterious, low confidence | 28.1 |

<sup>1</sup> Reference transcripts: *ATM* NM\_000051.3, *BARD1* NM\_000465.2, *BRIP1* NM\_032043.2, *CHEK2* NM\_007194.3, *FANCM* NM\_020937.2, *PALB2* NM\_024675.3, *RAD51C* NM\_058216.2, and *RAD51D* NM\_002878.3.

<sup>2</sup> All breast cancer patients after removing the overlap of 286 individuals between the familial and the unselected patient groups.

**Table S4.** Pathogenic variants in the *BRCA1* and *BRCA2* genes

| Gene             | Variant <sup>1</sup>                              | ClinVar                      | Combined<br>Unselected BC patients |      | Gene-panel sequencing<br>Unselected BC patients |      | Previous studies<br>Unselected BC patients |      | Gene-panel sequencing<br>Controls |      | Supplementary<br>References |
|------------------|---------------------------------------------------|------------------------------|------------------------------------|------|-------------------------------------------------|------|--------------------------------------------|------|-----------------------------------|------|-----------------------------|
|                  |                                                   |                              | Carriers/total                     | %    | Carriers/total                                  | %    | Carriers/total                             | %    | Carriers/total                    | %    |                             |
| <i>BRCA1</i>     | c.485_486del, p.(Val162GlufsTer19)                | Pathogenic <sup>3</sup>      | 1/1726                             | 0.06 | 1/1351                                          | 0.07 | –                                          |      | 0/1111                            | 0    | –                           |
| <i>BRCA1</i>     | c.594_597del, p.(Ser198ArgfsTer35)                | Pathogenic/Likely pathogenic | 1/1726                             | 0.06 | –                                               |      | 1/370                                      | 0.27 | –                                 |      | [1]                         |
| <i>BRCA1</i>     | c.667_668del, p.(Lys223GlyfsTer4)                 | Pathogenic                   | 1/1726                             | 0.06 | –                                               |      | 1/370                                      | 0.27 | –                                 |      | [1]                         |
| <i>BRCA1</i>     | c.3485del, p.(Asp1162ValfsTer48) <sup>2</sup>     | Pathogenic <sup>3</sup>      | 2/1726                             | 0.12 | 1/1356                                          | 0.07 | 1/370                                      | 0.27 | 0/1112                            | 0    | [1-5]                       |
| <i>BRCA1</i>     | c.3626del, p.(Leu1209Ter) <sup>2</sup>            | Pathogenic <sup>3</sup>      | 1/1726                             | 0.06 | 1/1356                                          | 0.07 | –                                          |      | 0/1112                            | 0    | [1,2,4-6]                   |
| <i>BRCA1</i>     | c.4097-2A>G <sup>2</sup>                          | Pathogenic <sup>3</sup>      | 3/1726                             | 0.17 | 1/1356                                          | 0.07 | 2/370                                      | 0.54 | 0/1112                            | 0    | [1-7]                       |
| <i>BRCA1</i>     | c.4327C>T, p.(Arg1443Ter) <sup>2</sup>            | Pathogenic <sup>3</sup>      | 1/1726                             | 0.06 | –                                               |      | 1/370                                      | 0.27 | –                                 |      | [1-4]                       |
| <i>BRCA1</i>     | c.4357+1G>A <sup>2</sup>                          | Pathogenic <sup>3</sup>      | 1/1726                             | 0.06 | 1/1313                                          | 0.08 | –                                          |      | 0/1052                            | 0    | [5]                         |
| <i>BRCA1</i>     | ex13dup <sup>2</sup>                              | Pathogenic                   | 1/1726                             | 0.06 | 1/1137                                          | 0.09 | –                                          |      | 0/1025                            | 0    | [5,8]                       |
| <i>BRCA1</i>     | c.4480G>T, p.(Glu1494Ter)                         | Pathogenic <sup>3</sup>      | 1/1726                             | 0.06 | –                                               |      | 1/370                                      | 0.27 | –                                 |      | [1]                         |
| <i>BRCA1</i>     | c.5209dup, p.(Arg1737LysfsTer93)                  | Pathogenic <sup>3</sup>      | 1/1726                             | 0.06 | 1/1356                                          | 0.07 | –                                          |      | 0/1110                            | 0    | [1]                         |
| <i>BRCA1</i>     | c.5266dup, p.(Gln1756ProfsTer74) <sup>2</sup>     | Pathogenic <sup>3</sup>      | 1/1726                             | 0.06 | 1/1353                                          | 0.07 | –                                          |      | 0/1097                            | 0    | [1,2,5]                     |
| <i>BRCA2</i>     | c.376C>T, p.(Gln126Ter)                           | Pathogenic/Likely pathogenic | 1/1726                             | 0.06 | 1/1355                                          | 0.07 | –                                          |      | 0/1112                            | 0    | –                           |
| <i>BRCA2</i>     | c.517-2A>G                                        | Pathogenic <sup>3</sup>      | 1/1726                             | 0.06 | 1/1356                                          | 0.07 | –                                          |      | 0/1112                            | 0    | [1]                         |
| <i>BRCA2</i>     | c.771_775del, p.(Asn257LysfsTer17) <sup>2</sup>   | Pathogenic <sup>3</sup>      | 4/1726                             | 0.23 | 2/1324                                          | 0.15 | 2/370                                      | 0.54 | 0/1060                            | 0    | [1-3,5-7,9]                 |
| <i>BRCA2</i>     | c.1689G>A, p.(Trp563Ter)                          | Pathogenic <sup>3</sup>      | 1/1726                             | 0.06 | 1/1314                                          | 0.08 | –                                          |      | 0/1068                            | 0    | –                           |
| <i>BRCA2</i>     | c.6275_6276del, p.(Leu2092ProfsTer7) <sup>2</sup> | Pathogenic <sup>3</sup>      | 1/1726                             | 0.06 | 1/1352                                          | 0.07 | –                                          |      | 0/1106                            | 0    | [3-7]                       |
| <i>BRCA2</i>     | c.7480C>T, p.(Arg2494Ter) <sup>2</sup>            | Pathogenic <sup>3</sup>      | 6/1726                             | 0.35 | 6/1356                                          | 0.44 | –                                          |      | 1/1112                            | 0.09 | [1-5]                       |
| <i>BRCA2</i>     | c.8177A>G, p.(Tyr2726Cys)                         | Pathogenic/Likely pathogenic | 1/1726                             | 0.06 | 1/1356                                          | 0.07 | –                                          |      | 0/1112                            | 0    | –                           |
| <i>BRCA2</i>     | c.9118-2A>G <sup>2</sup>                          | Pathogenic <sup>3</sup>      | 4/1726                             | 0.23 | 2/1356                                          | 0.15 | 2/370                                      | 0.54 | 0/1109                            | 0    | [1-6]                       |
| <i>BRCA2</i>     | c.9692_9699dup, p.(Met3234HisfsTer18)             | NA                           | 1/1726                             | 0.06 | 1/1356                                          | 0.07 | –                                          |      | 0/1112                            | 0    | –                           |
| Any <i>BRCA1</i> |                                                   |                              | 15/1726                            | 0.87 | 8/1356                                          | 0.59 | 7/370                                      | 1.89 | 0/1112                            | 0    |                             |
| Any <i>BRCA2</i> |                                                   |                              | 20/1726                            | 1.16 | 16/1356                                         | 1.18 | 4/370                                      | 1.08 | 1/1112                            | 0.09 |                             |
| Total            |                                                   |                              | 35/1726                            | 2.03 | 24/1356                                         | 1.77 | 11/370                                     | 2.97 | 1/1112                            | 0.09 |                             |

<sup>1</sup> Reference transcripts: *BRCA1* NM\_007294.3 and *BRCA2* NM\_000059.3.

<sup>2</sup> Variants that recur in Finnish breast cancer patients.

<sup>3</sup> Pathogenicity reviewed by expert panel.

**Table S5.** Frequencies of pathogenic variants identified in patients diagnosed with breast cancer at different ages

**A.** Carriers of a *BRCA1/2* or a moderate-risk variant in the unselected patient group

| Age of diagnosis | Total | <i>BRCA1/2</i> variant | %   | Moderate-risk variant | %    | Combined <sup>1</sup> | %    |
|------------------|-------|------------------------|-----|-----------------------|------|-----------------------|------|
| ≤ 39             | 78    | 7                      | 9.0 | 7                     | 9.0  | 14                    | 17.9 |
| 40-49            | 284   | 7                      | 2.5 | 30                    | 10.6 | 37                    | 13.0 |
| 50-59            | 458   | 7                      | 1.5 | 33                    | 7.2  | 38                    | 8.3  |
| 60-69            | 307   | 2                      | 0.7 | 22                    | 7.2  | 24                    | 7.8  |
| 70-79            | 161   | 1                      | 0.6 | 15                    | 9.3  | 16                    | 9.9  |
| ≥ 80             | 68    | 0                      | 0   | 5                     | 7.4  | 5                     | 7.4  |
| Total            | 1356  | 24                     | 1.8 | 112                   | 8.3  | 134                   | 9.9  |

**B.** Carriers of a *BRCA1/2* or a moderate-risk variant, excluding the *FANCM* and *BRIP1* variants, in the unselected patient group

| Age of diagnosis | Total | <i>BRCA1/2</i> variant | %   | Moderate-risk variant | %   | Combined <sup>1</sup> | %    |
|------------------|-------|------------------------|-----|-----------------------|-----|-----------------------|------|
| ≤ 39             | 78    | 7                      | 9.0 | 6                     | 7.7 | 13                    | 16.7 |
| 40-49            | 284   | 7                      | 2.5 | 18                    | 6.3 | 25                    | 8.8  |
| 50-59            | 458   | 7                      | 1.5 | 21                    | 4.6 | 26                    | 5.7  |
| 60-69            | 307   | 2                      | 0.7 | 11                    | 3.6 | 13                    | 4.2  |
| 70-79            | 161   | 1                      | 0.6 | 10                    | 6.2 | 11                    | 6.8  |
| ≥ 80             | 68    | 0                      | 0.0 | 3                     | 4.4 | 3                     | 4.4  |
| Total            | 1356  | 24                     | 1.8 | 69                    | 5.1 | 91                    | 6.7  |

<sup>1</sup>The patients with both a *BRCA1/2* and a moderate-risk variant were included once in the combined frequencies.

## Supplementary References (Table S4)

1. Nurmi, A.; Muranen, T.A.; Pelttari, L.M.; Kiiski, J.I.; Heikkinen, T.; Lehto, S.; Kallioniemi, A.; Schleutker, J.; Butzow, R.; Blomqvist, C.; et al. Recurrent moderate-risk mutations in Finnish breast and ovarian cancer patients. *Int J Cancer* **2019**, *145*, 2692-2700, doi:10.1002/ijc.32309.
2. Vehmanen, P.; Friedman, L.S.; Eerola, H.; McClure, M.; Ward, B.; Sarantaus, L.; Kainu, T.; Syrjakoski, K.; Pyrhonen, S.; Kallioniemi, O.P.; et al. Low proportion of BRCA1 and BRCA2 mutations in Finnish breast cancer families: evidence for additional susceptibility genes. *Hum Mol Genet* **1997**, *6*, 2309-2315, doi:10.1093/hmg/6.13.2309.
3. Syrjakoski, K.; Vahteristo, P.; Eerola, H.; Tamminen, A.; Kivinummi, K.; Sarantaus, L.; Holli, K.; Blomqvist, C.; Kallioniemi, O.P.; Kainu, T.; et al. Population-based study of BRCA1 and BRCA2 mutations in 1035 unselected Finnish breast cancer patients. *J Natl Cancer Inst* **2000**, *92*, 1529-1531, doi:10.1093/jnci/92.18.1529.
4. Sarantaus, L.; Huusko, P.; Eerola, H.; Launonen, V.; Vehmanen, P.; Rapakko, K.; Gillanders, E.; Syrjakoski, K.; Kainu, T.; Vahteristo, P.; et al. Multiple founder effects and geographical clustering of BRCA1 and BRCA2 families in Finland. *Eur J Hum Genet* **2000**, *8*, 757-763, doi:10.1038/sj.ejhg.5200529.
5. Pallonen, T.A.; Lempiainen, S.M.M.; Joutsiniemi, T.K.; Aaltonen, R.I.; Pohjola, P.E.; Kankuri-Tammilehto, M.K. Genetic, clinic and histopathologic characterization of BRCA-associated hereditary breast and ovarian cancer in southwestern Finland. *Sci Rep* **2022**, *12*, 6704, doi:10.1038/s41598-022-10519-y.
6. Huusko, P.; Paakkonen, K.; Launonen, V.; Poyhonen, M.; Blanco, G.; Kauppila, A.; Puistola, U.; Kiviniemi, H.; Kujala, M.; Leisti, J.; et al. Evidence of founder mutations in Finnish BRCA1 and BRCA2 families. *Am J Hum Genet* **1998**, *62*, 1544-1548, doi:10.1086/301880.
7. Hartikainen, J.M.; Kataja, V.; Pirskanen, M.; Arffman, A.; Ristonmaa, U.; Vahteristo, P.; Ryyanen, M.; Heinonen, S.; Kosma, V.M.; Mannermaa, A. Screening for BRCA1 and BRCA2 mutations in Eastern Finnish breast/ovarian cancer families. *Clin Genet* **2007**, *72*, 311-320, doi:10.1111/j.1399-0004.2007.00866.x.
8. Pelttari, L.M.; Shimelis, H.; Toiminen, H.; Kvist, A.; Torngren, T.; Borg, A.; Blomqvist, C.; Butzow, R.; Couch, F.; Aittomaki, K.; et al. Gene-panel testing of breast and ovarian cancer patients identifies a recurrent RAD51C duplication. *Clin Genet* **2018**, *93*, 595-602, doi:10.1111/cge.13123.
9. Barkardottir, R.B.; Sarantaus, L.; Arason, A.; Vehmanen, P.; Bendahl, P.O.; Kainu, T.; Syrjakoski, K.; Krahe, R.; Huusko, P.; Pyrhonen, S.; et al. Haplotype analysis in Icelandic and Finnish BRCA2 999del5 breast cancer families. *Eur J Hum Genet* **2001**, *9*, 773-779, doi:10.1038/sj.ejhg.5200717.
